# Supplementary material for: Synthesis and studies of electrochemical properties of lophine derivatives
Source: Royal Society of Chemistry journal article supplement (doi:10.1039/c4ra08601e), 2014-01-01

## Supporting information

### Synthesis and studies of electrochemical properties of lophine derivatives

A. Hariharasubramanian<sup>a</sup>, Y. Dominic Ravichandran<sup>\*a</sup>

<sup>a</sup>Organic Chemistry Division, School of Advanced Sciences, VIT University, Vellore-632014,  
Tamilnadu, India.

---

<sup>1</sup> Corresponding author: Fax: +91-416-2243092, +91-416-2245766

E-mail address: ydominic64@yahoo.co.in

**IR spectra of 2,4,5-triphenyl-1H-imidazole**

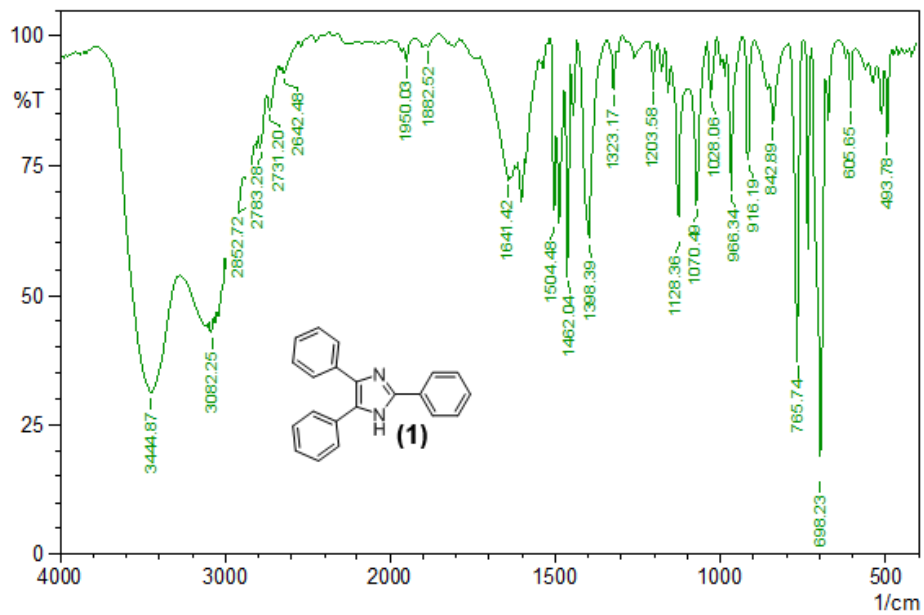

### <sup>1</sup>H NMR of 2,4,5-triphenyl-1H-imidazole

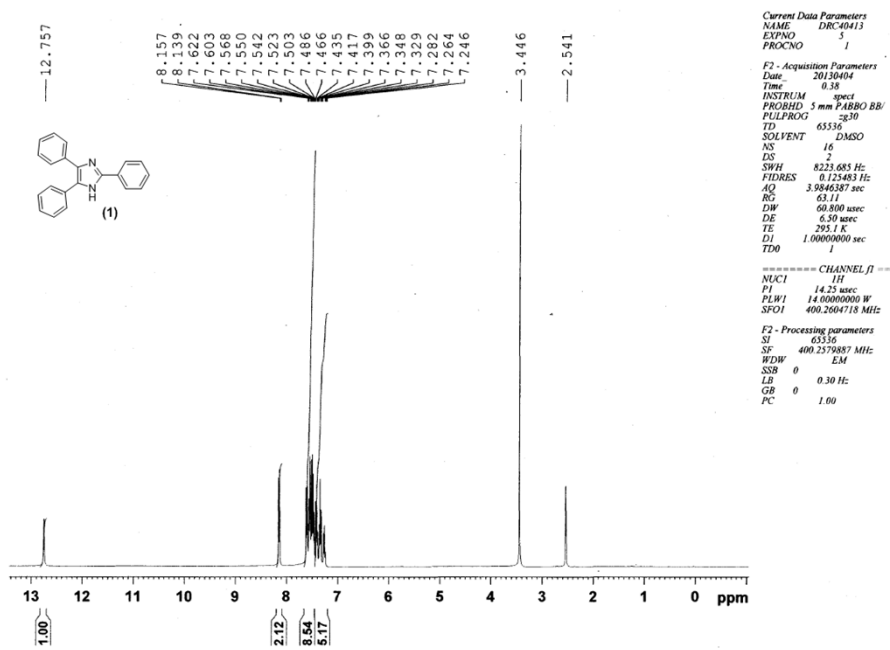

### <sup>13</sup>C NMR of 2,4,5-triphenyl-1H-imidazole

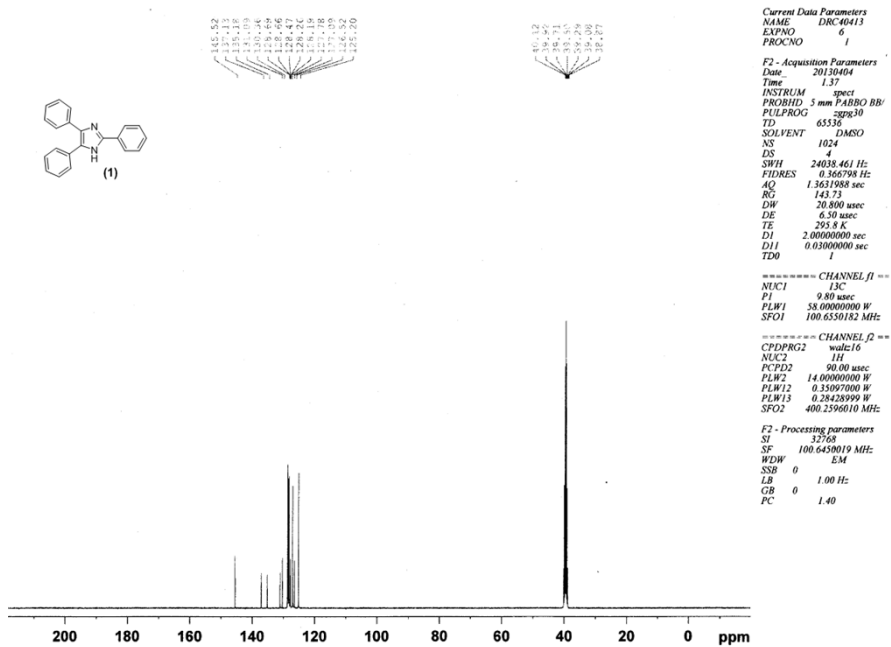

LC-MS of 2,4,5-triphenyl-1H-imidazole

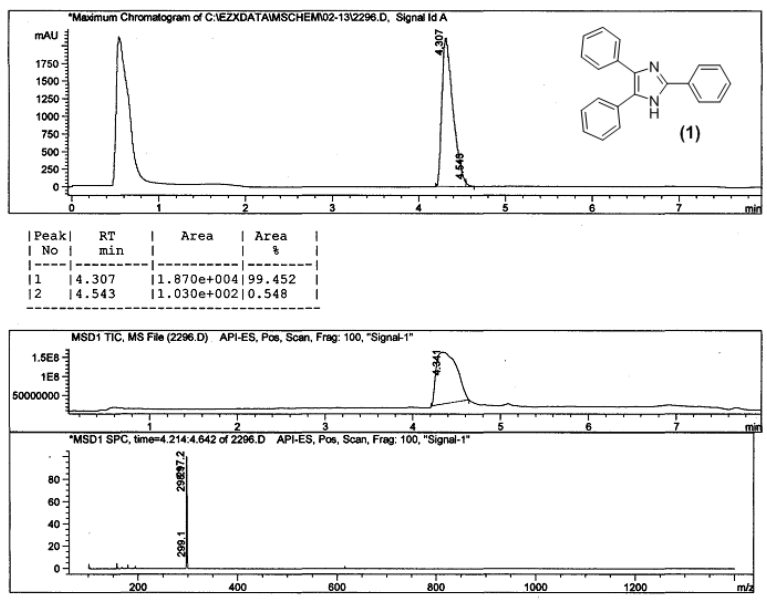

IR spectra of 4-(4,5-diphenyl-1H-imidazol-2-yl)phenol

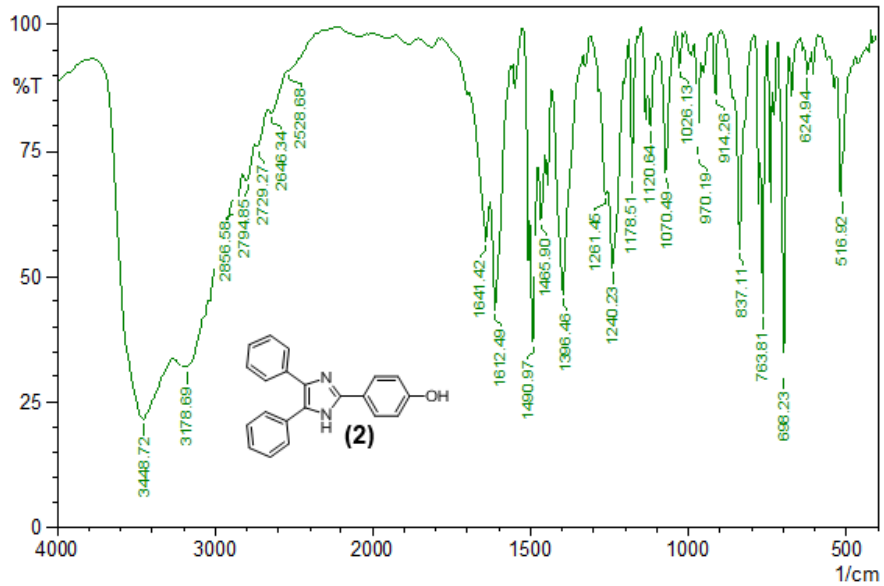

### <sup>1</sup>H NMR of 4-(4,5-diphenyl-1H-imidazol-2-yl)phenol

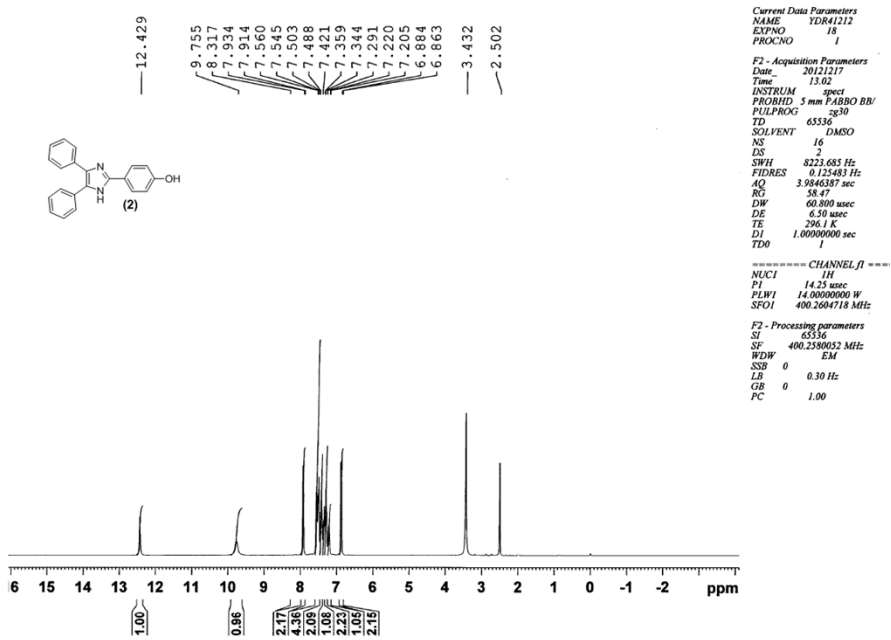

### <sup>13</sup>C NMR of 4-(4,5-diphenyl-1H-imidazol-2-yl)phenol

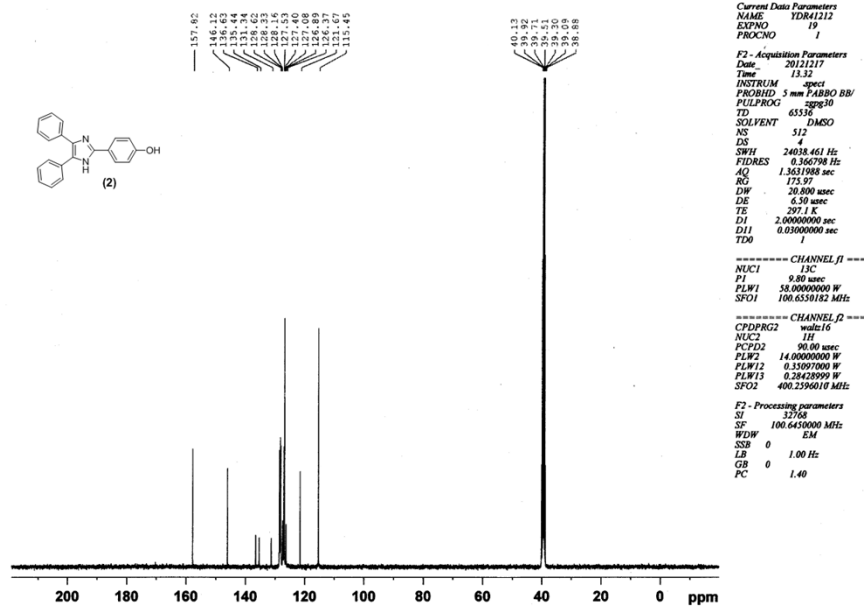

LC-MS of 4-(4,5-diphenyl-1H-imidazol-2-yl)phenol

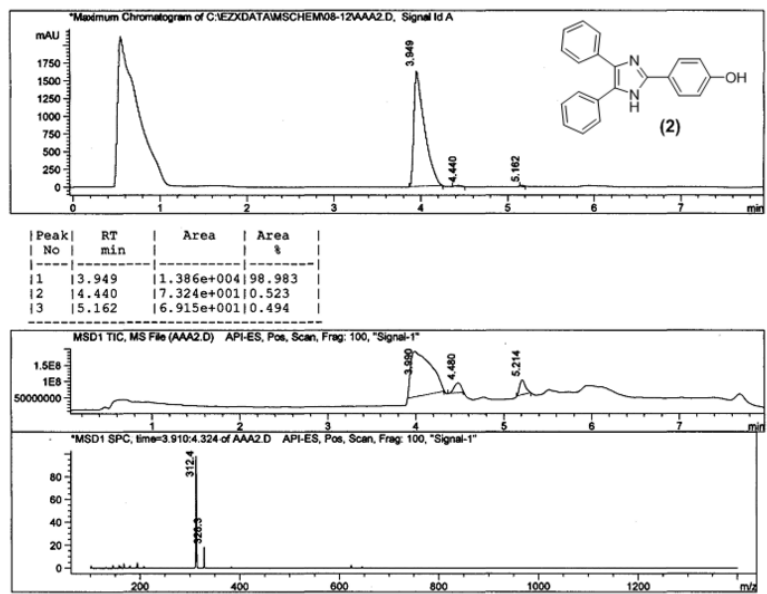

IR spectra of 2-(4-methoxyphenyl)-4,5-diphenyl-1H-imidazole

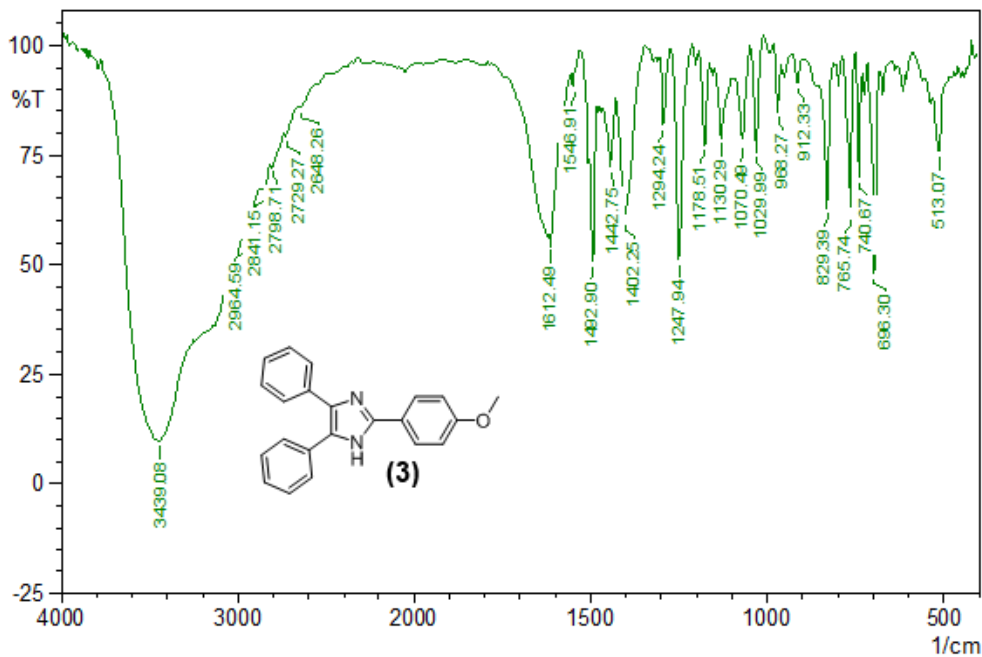

### <sup>1</sup>H NMR of 2-(4-methoxyphenyl)-4,5-diphenyl-1H-imidazole

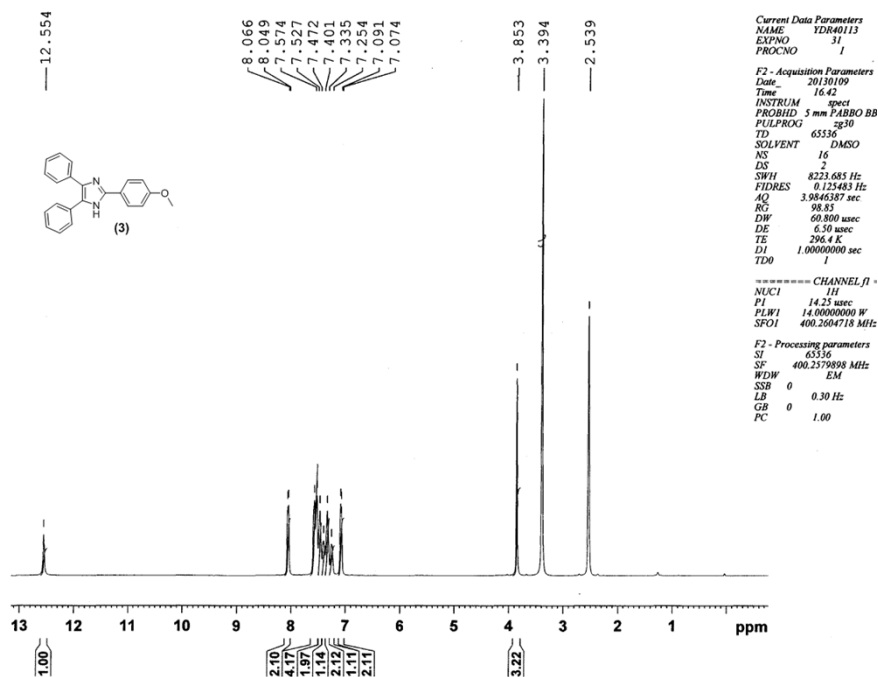

### <sup>13</sup>C NMR of 2-(4-methoxyphenyl)-4,5-diphenyl-1H-imidazole

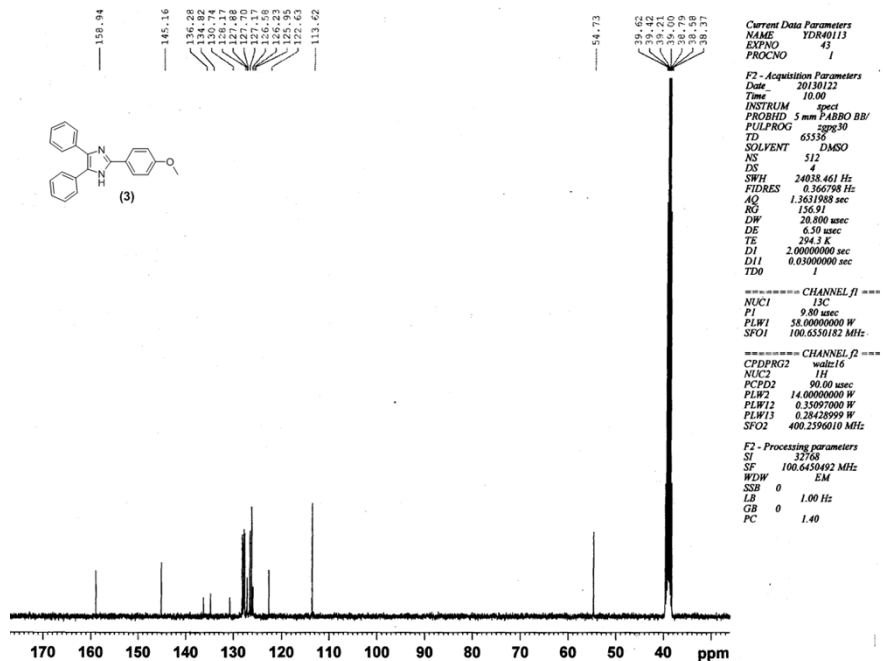

LC-MS of 2-(4-methoxyphenyl)-4,5-diphenyl-1H-imidazole

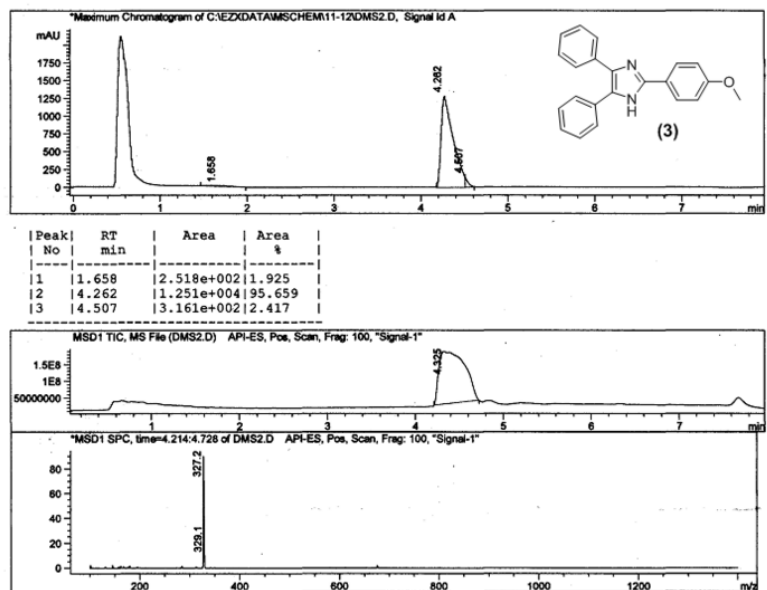

IR Spectra of 2-(2,5-dichlorophenyl)-4,5-diphenyl-1H-imidazole

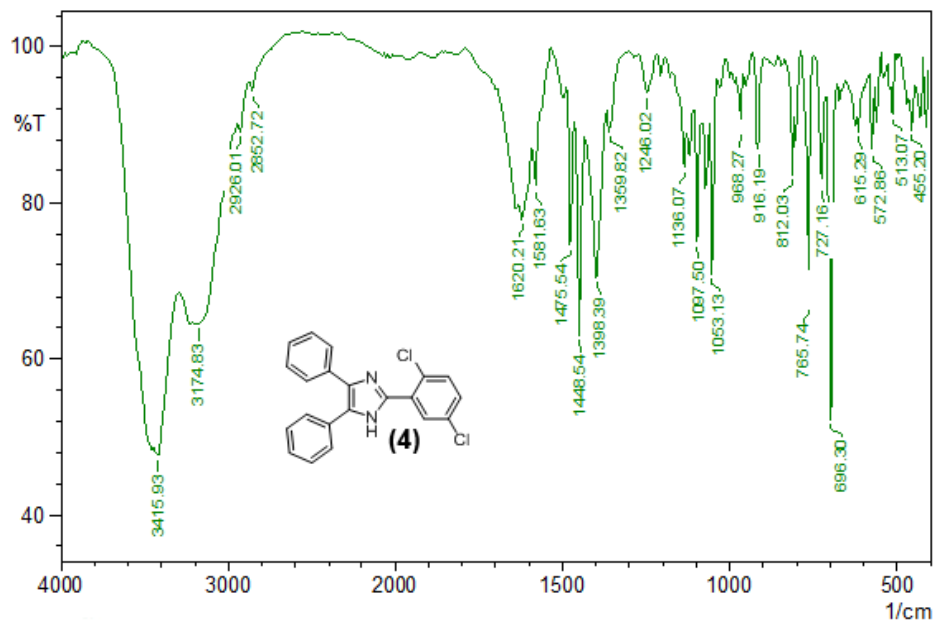

### <sup>1</sup>H NMR of 2-(2,5-dichlorophenyl)-4,5-diphenyl-1H-imidazole

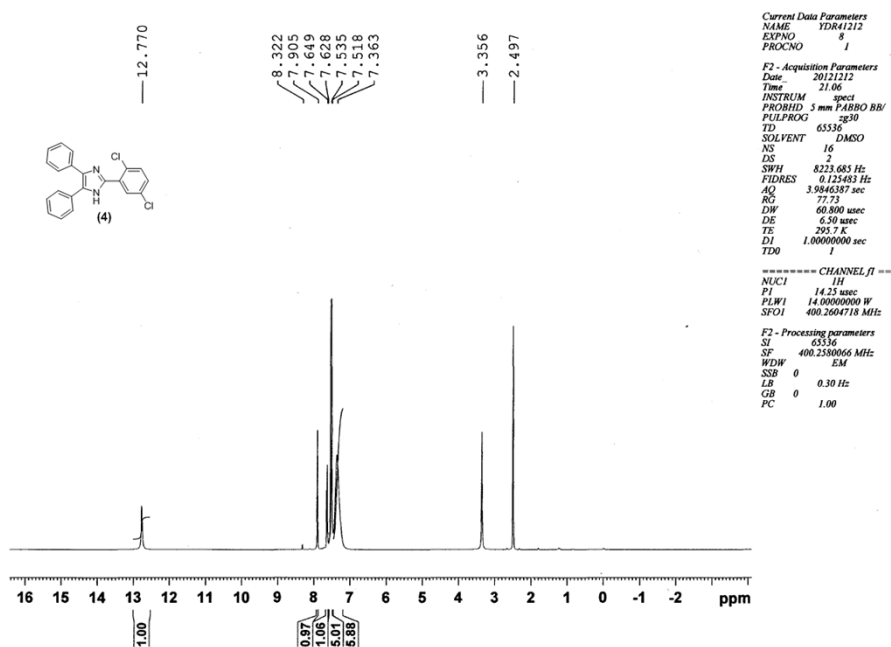

Current Data Parameters  
 NAME YDR41212  
 EXPNO 8  
 PROCNO 1

F2 - Acquisition Parameters  
 Date\_ 20121212  
 Time 21.06  
 INSTRUM spect  
 PROBHD 5 mm PARBO BB/  
 PULPROG zg30  
 TD 6536  
 SOLVENT DMSO  
 NS 16  
 DS 2  
 SWH 823.683 Hz  
 FIDRES 0.123483 Hz  
 AQ 3.9846387 sec  
 RG 77.33  
 DW 60.800 usec  
 DE 6.50 usec  
 TE 295.7 K  
 D1 1.00000000 sec  
 TDO 1

===== CHANNEL f1 =====  
 NUC1 1H  
 P1 14.23 usec  
 PLW1 14.00000000 W  
 SFO1 400.2604718 MHz

F2 - Processing parameters  
 SF 400.2580066 MHz  
 WDW EM  
 SSB 0  
 LB 0.30 Hz  
 GB 0  
 PC 1.00

### <sup>13</sup>C NMR of 2-(2,5-dichlorophenyl)-4,5-diphenyl-1H-imidazole



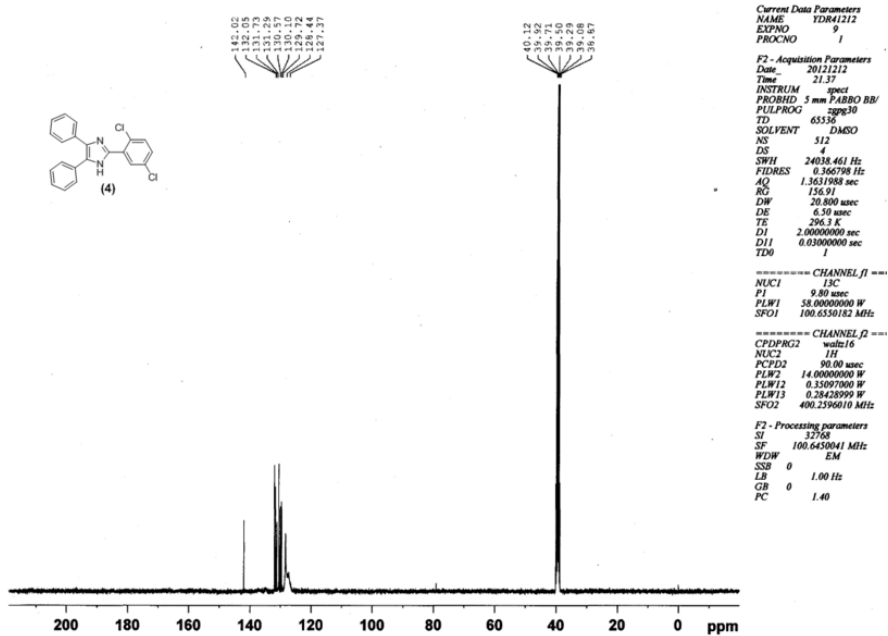

LC-MS of 2-(2,5-dichlorophenyl)-4,5-diphenyl-1H-imidazole

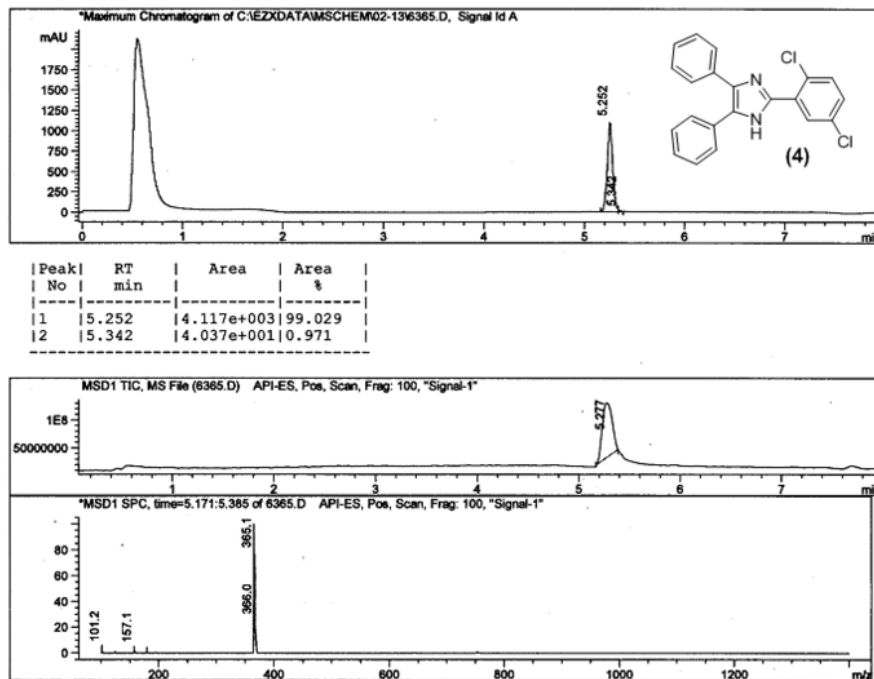

IR spectra of 4,5-diphenyl-2-p-tolyl-1H-imidazole

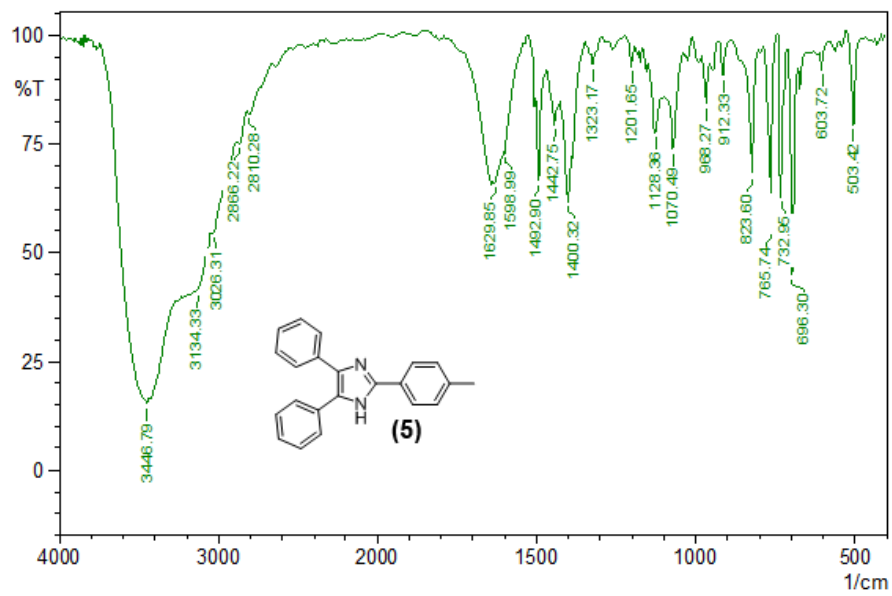

**<sup>1</sup>H NMR of 4,5-diphenyl-2-p-tolyl-1H-imidazole**

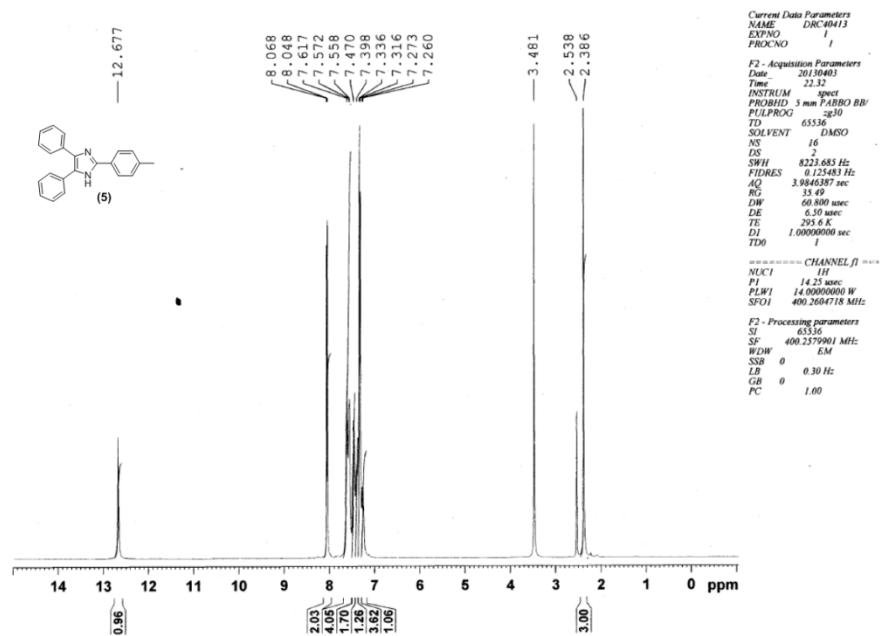

**<sup>13</sup>C NMR of 4,5-diphenyl-2-p-tolyl-1H-imidazole**

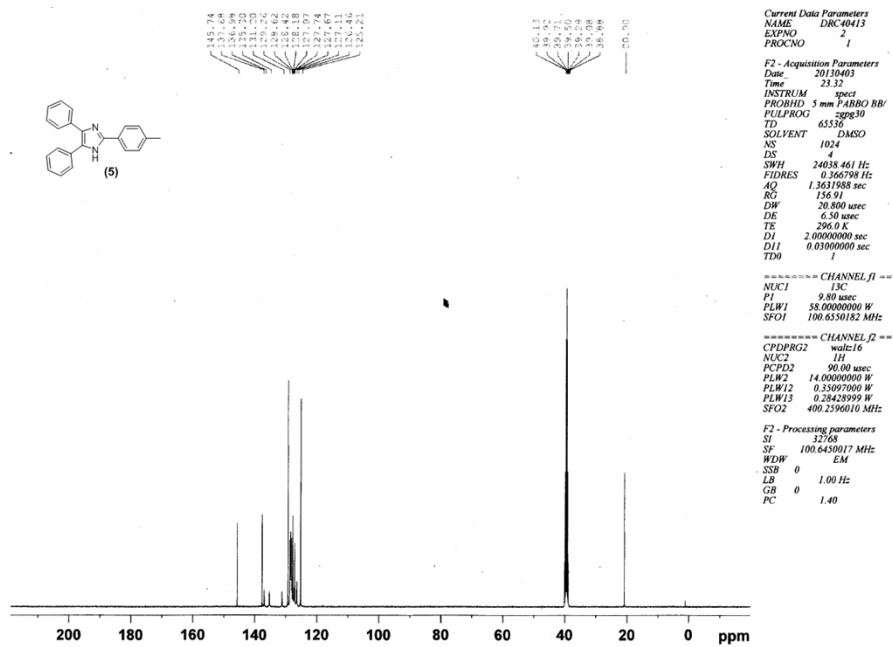

### LC-MS of 4,5-diphenyl-2-p-tolyl-1H-imidazole

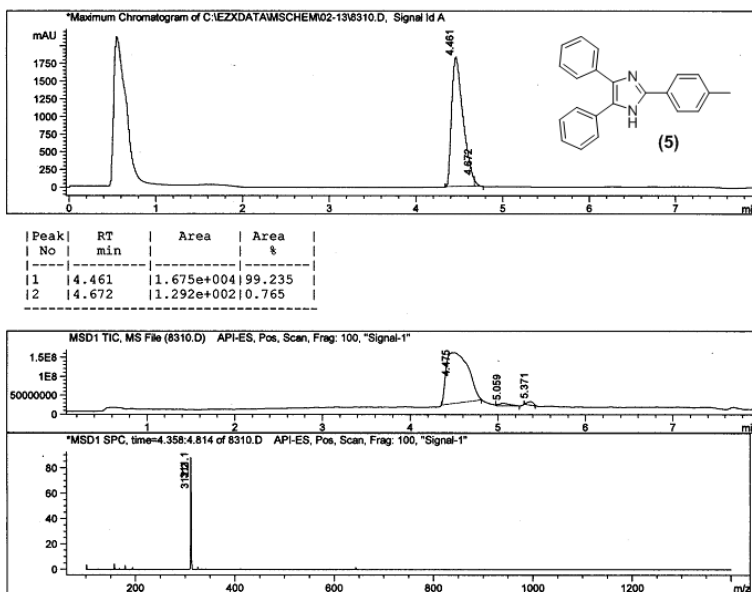

### IR spectra of 2-(3,4-dimethoxyphenyl)-4,5-diphenyl-1H-imidazole

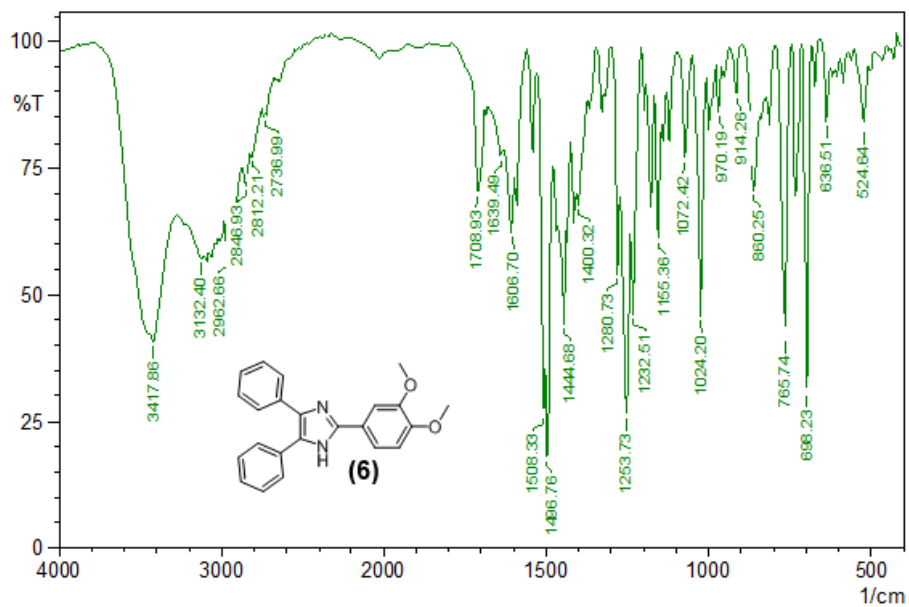

**<sup>1</sup>H NMR of 2-(3,4-dimethoxyphenyl)-4,5-diphenyl-1H-imidazole**

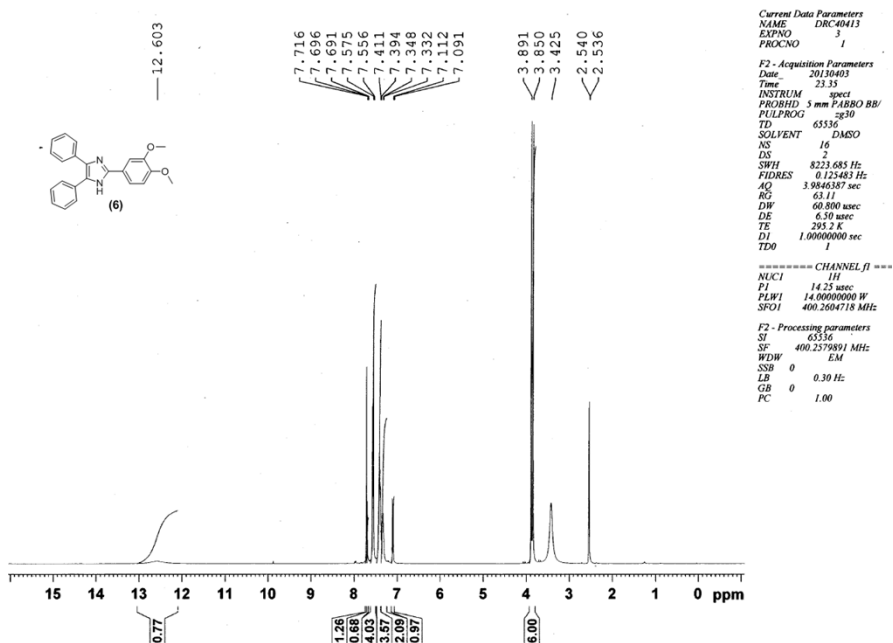

**<sup>13</sup>C NMR of 2-(3,4-dimethoxyphenyl)-4,5-diphenyl-1H-imidazole**

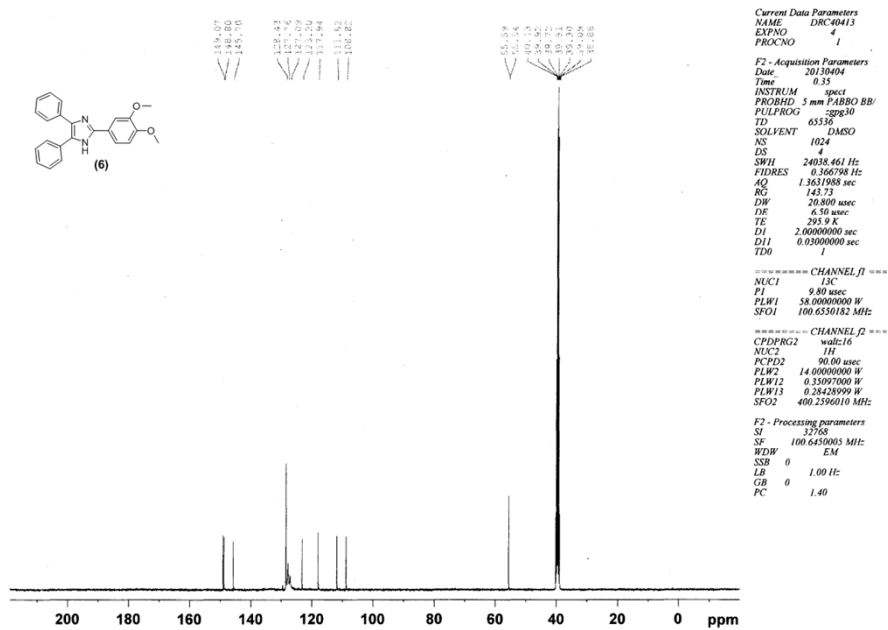

LC-MS of 2-(3,4-dimethoxyphenyl)-4,5-diphenyl-1H-imidazole

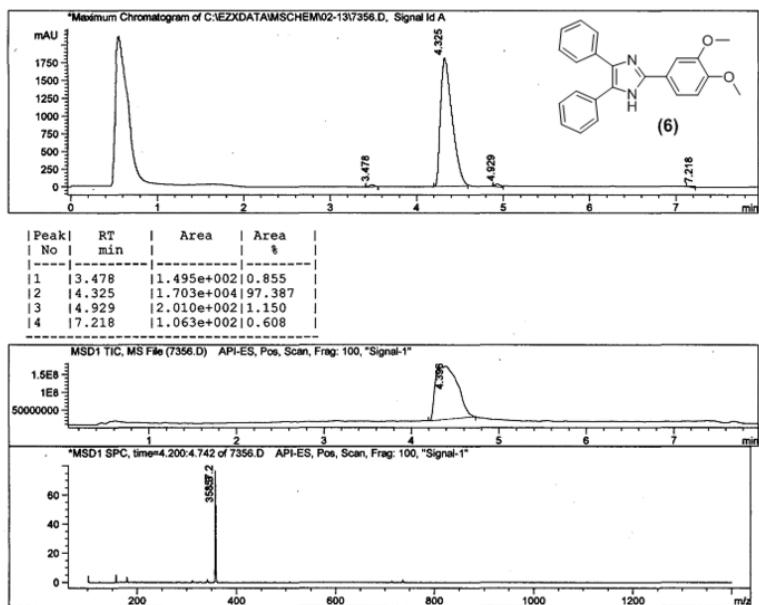

IR spectra of 2-(3-nitrophenyl)-4,5-diphenyl-1H-imidazole

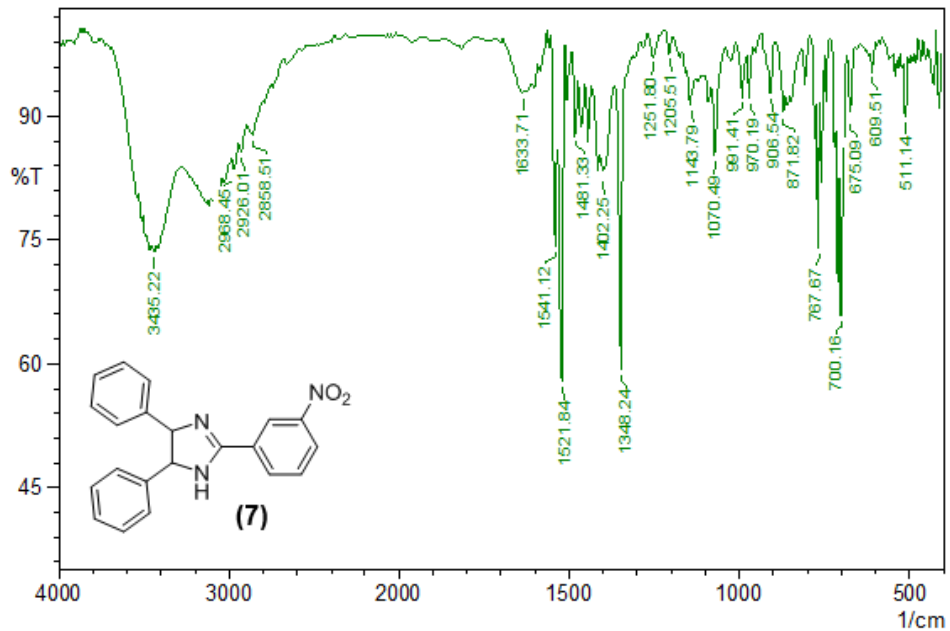

### <sup>1</sup>H NMR of 2-(3-nitrophenyl)-4,5-diphenyl-1H-imidazole

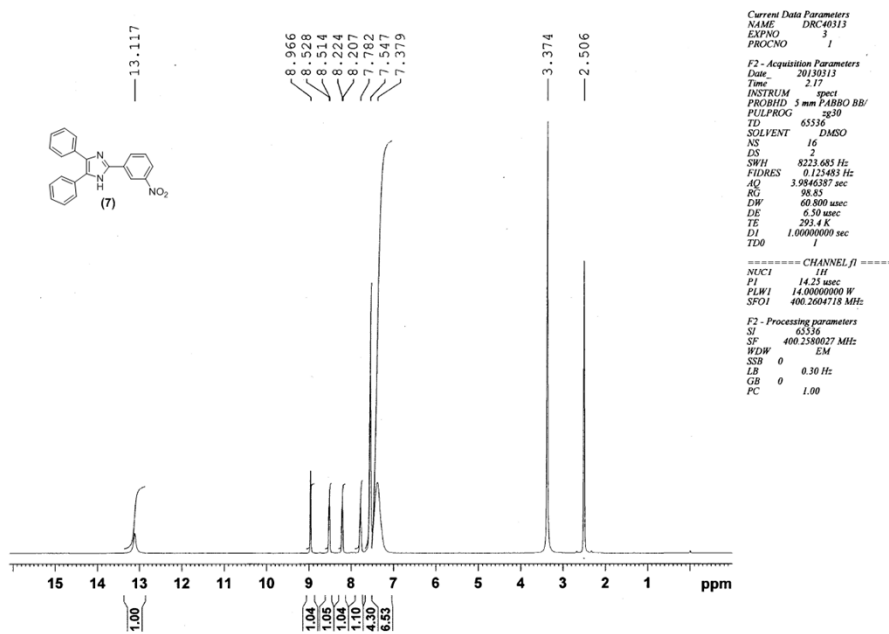

### <sup>13</sup>C NMR of 2-(3-nitrophenyl)-4,5-diphenyl-1H-imidazole

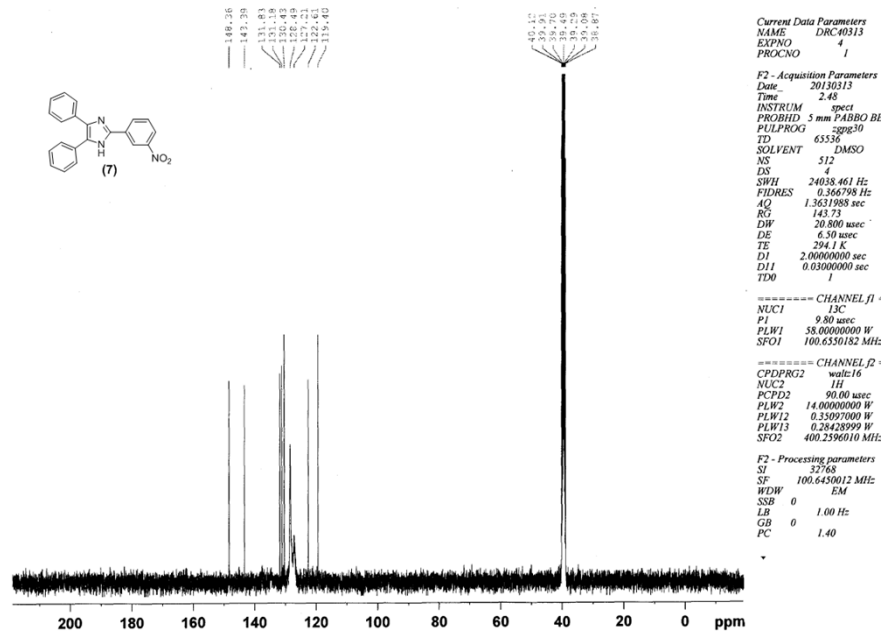

LC-MS of 2-(3-nitrophenyl)-4,5-diphenyl-1H-imidazole

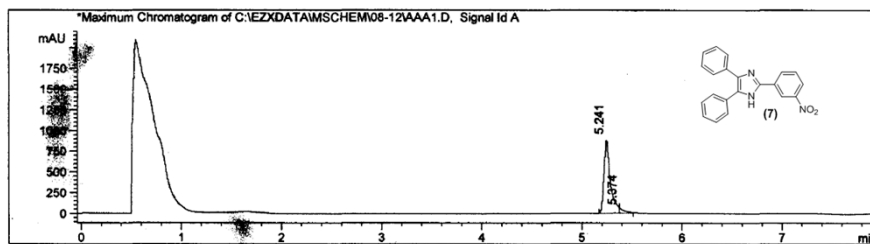

| Peak No | RT min | Area       | Area % |
|---------|--------|------------|--------|
| 1       | 5.241  | 3.870e+003 | 95.307 |
| 2       | 5.374  | 1.906e+002 | 4.693  |

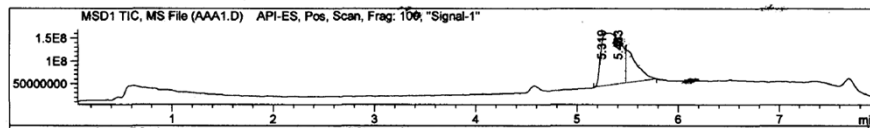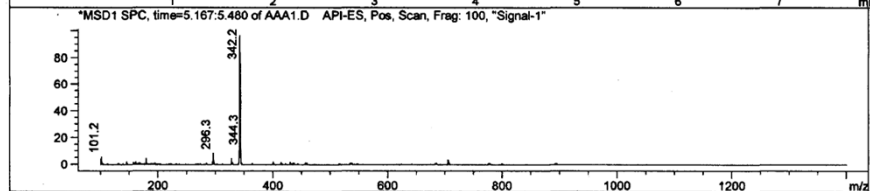

IR spectra of 2-(4-fluorophenyl)-4,5-diphenyl-1H-imidazole

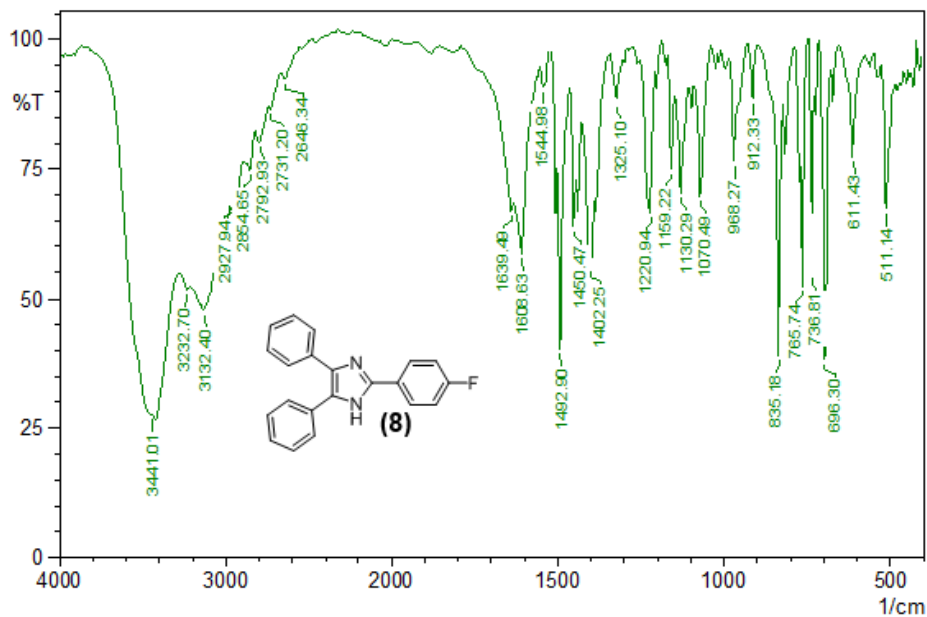

### <sup>1</sup>H NMR of 2-(4-fluorophenyl)-4,5-diphenyl-1H-imidazole

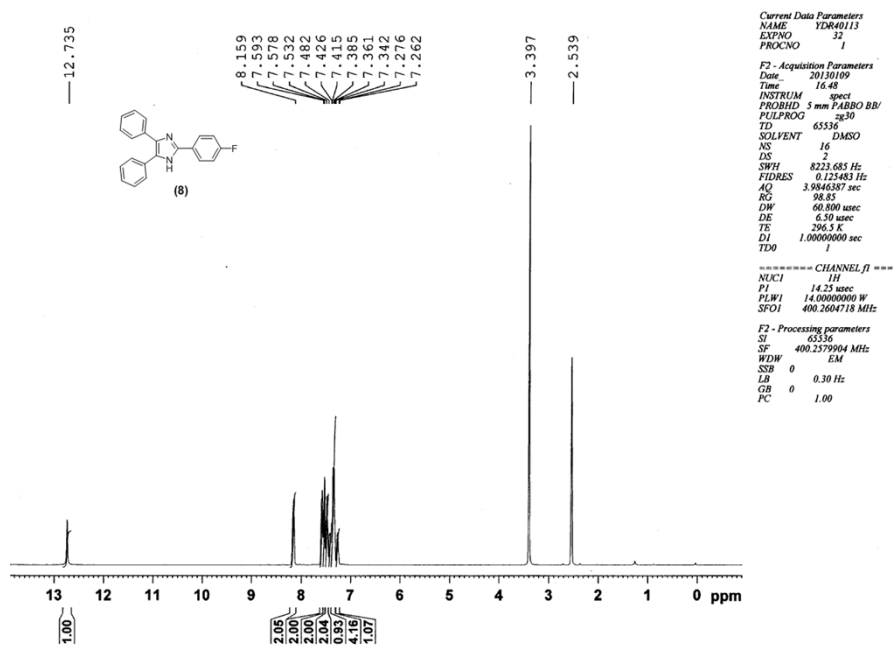

### <sup>13</sup>C NMR of 2-(4-fluorophenyl)-4,5-diphenyl-1H-imidazole



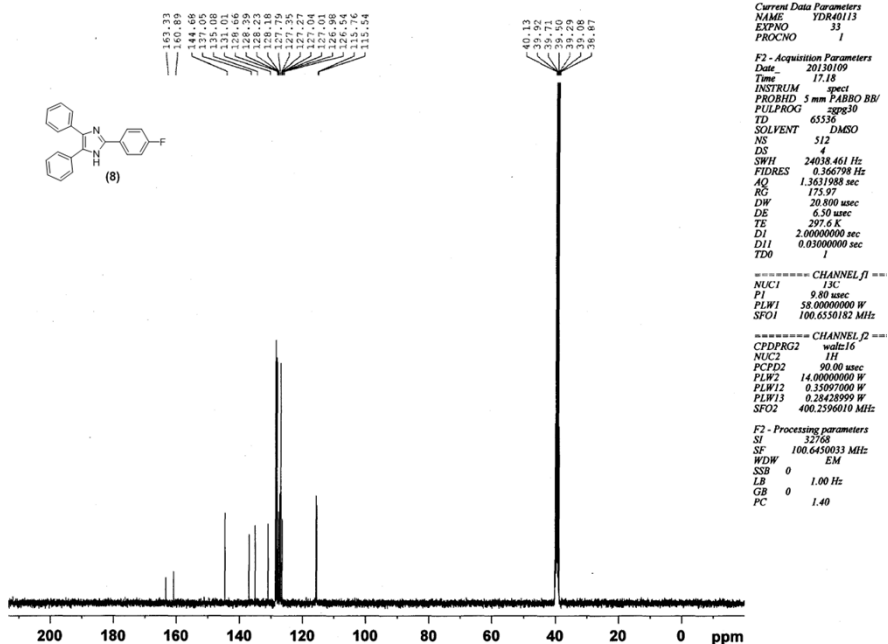

LC-MS of 2-(4-fluorophenyl)-4,5-diphenyl-1H-imidazole

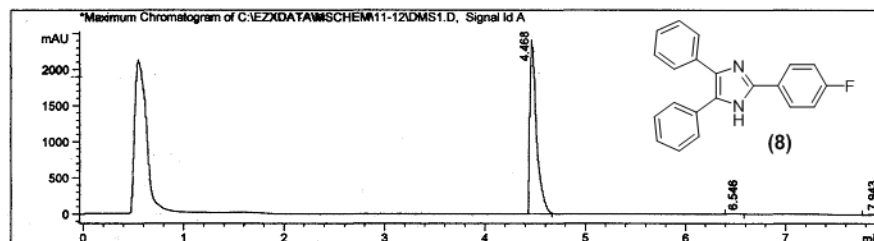

| Peak No | RT min | Area       | Area % |
|---------|--------|------------|--------|
| 1       | 4.468  | 1.109e+004 | 98.475 |
| 2       | 6.546  | 4.287e+001 | 0.381  |
| 3       | 7.943  | 1.289e+002 | 1.145  |

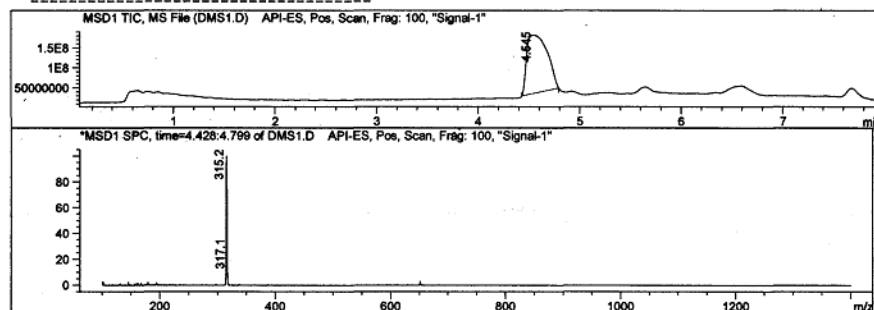

IR spectra of 2-(4-chlorophenyl)-4,5-diphenyl-1H-imidazole

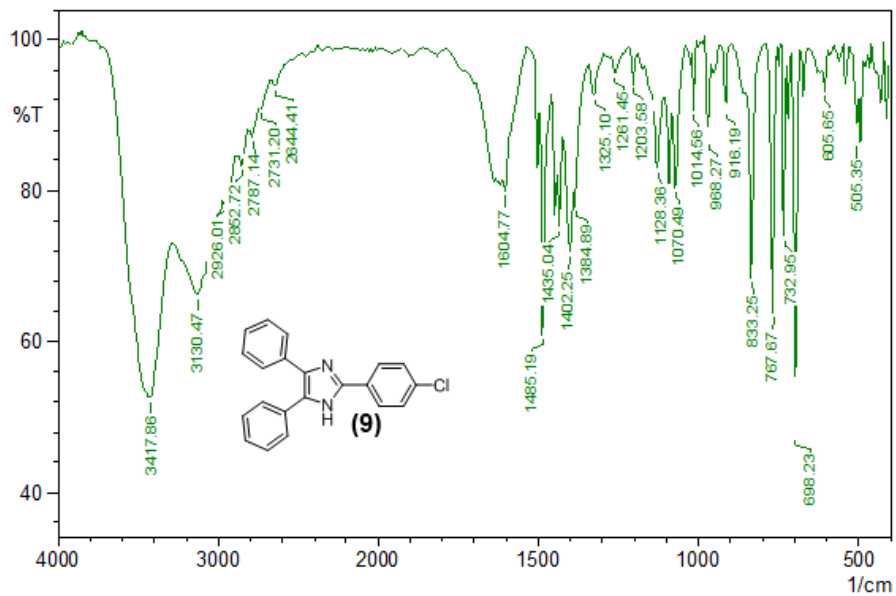

### <sup>1</sup>H NMR of 2-(4-chlorophenyl)-4,5-diphenyl-1H-imidazole

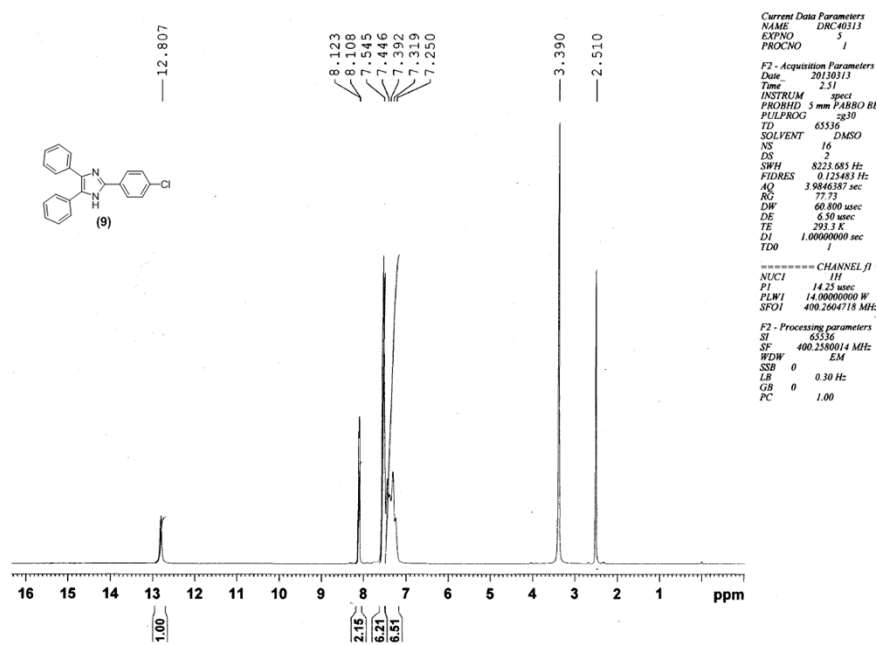

### <sup>13</sup>C NMR of 2-(4-chlorophenyl)-4,5-diphenyl-1H-imidazole

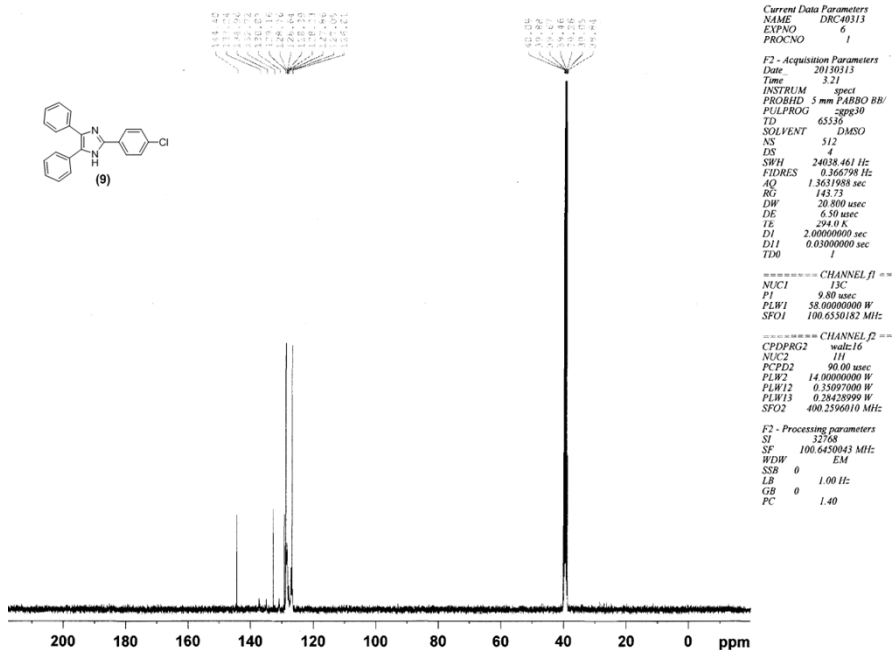

LC-MS of 2-(4-chlorophenyl)-4,5-diphenyl-1H-imidazole

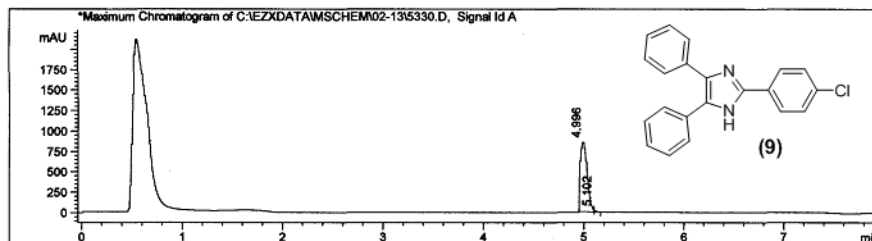

| Peak No | RT min | Area       | Area % |
|---------|--------|------------|--------|
| 1       | 4.996  | 4.011e+003 | 99.340 |
| 2       | 5.102  | 2.665e+001 | 0.660  |

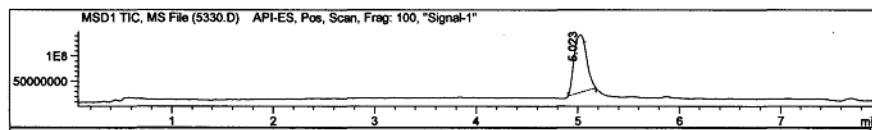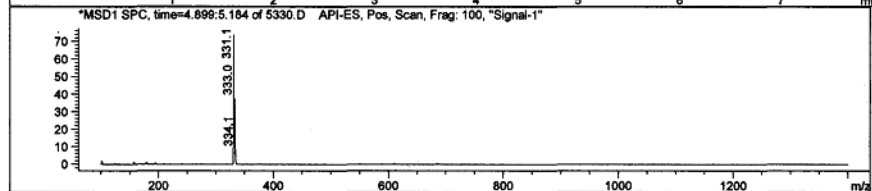

IR spectra of 2-(4-bromophenyl)-4,5-diphenyl-1H-imidazole

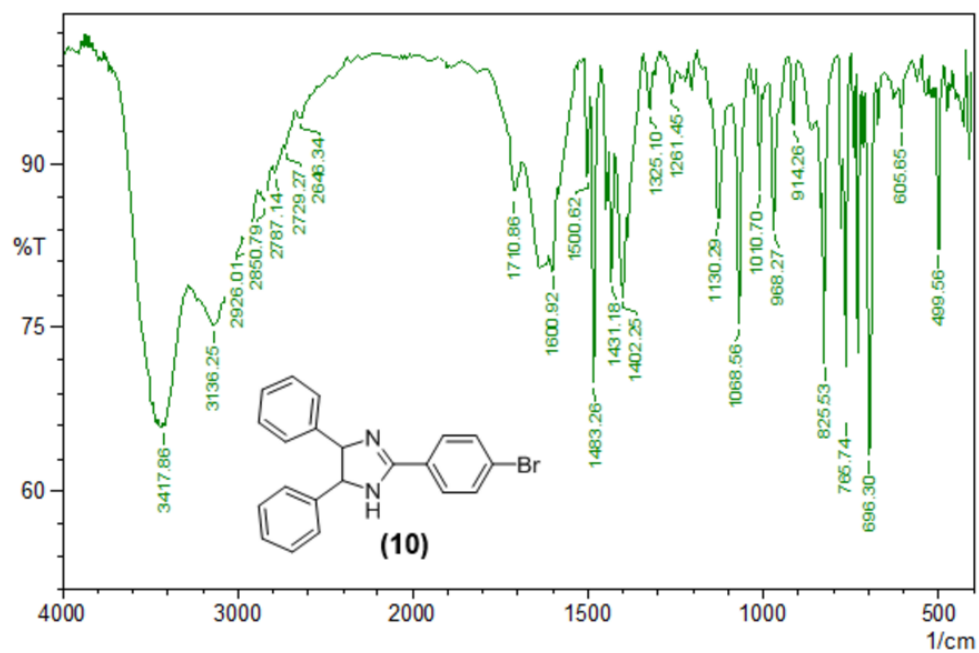

### <sup>1</sup>H NMR of 2-(4-bromophenyl)-4,5-diphenyl-1H-imidazole

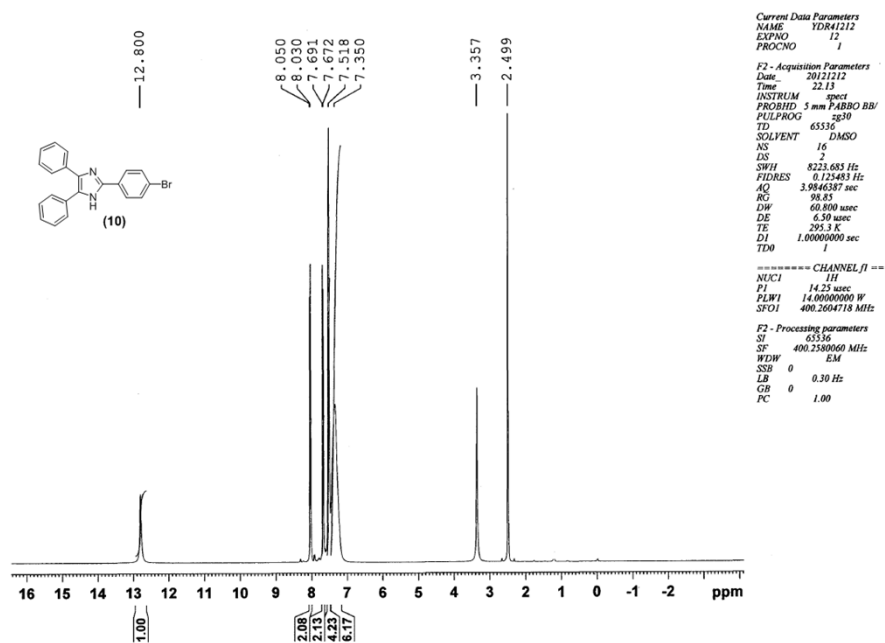

### <sup>13</sup>C NMR of 2-(4-bromophenyl)-4,5-diphenyl-1H-imidazole

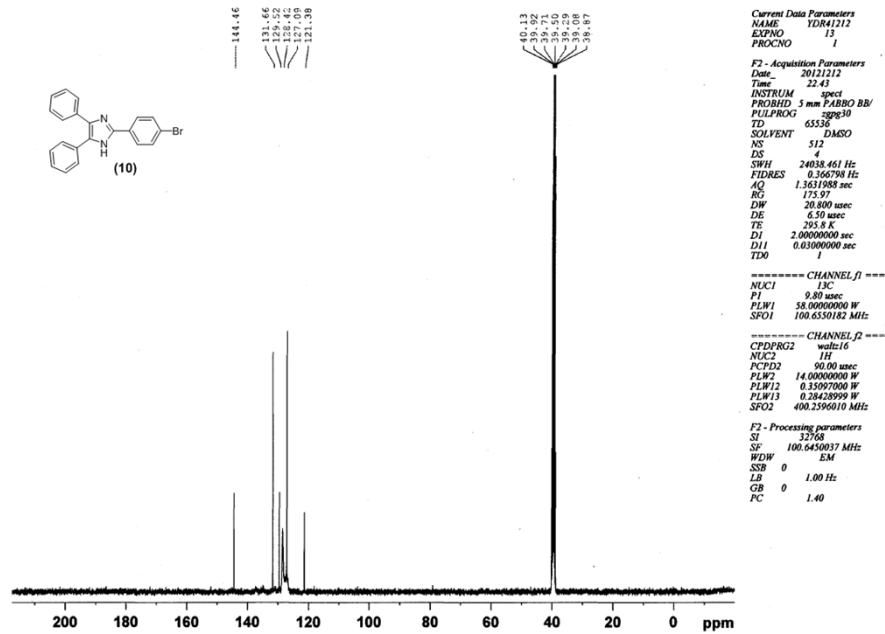

LC-MS of 2-(4-bromophenyl)-4,5-diphenyl-1H-imidazole

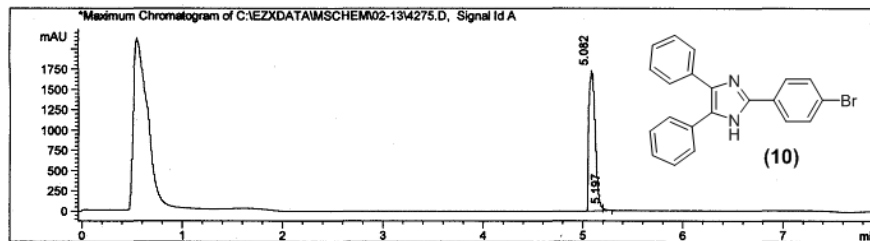

| Peak No | RT min | Area       | Area % |
|---------|--------|------------|--------|
| 1       | 5.082  | 7.710e+003 | 99.175 |
| 2       | 5.197  | 6.417e+001 | 0.825  |

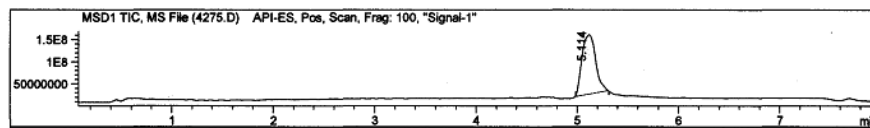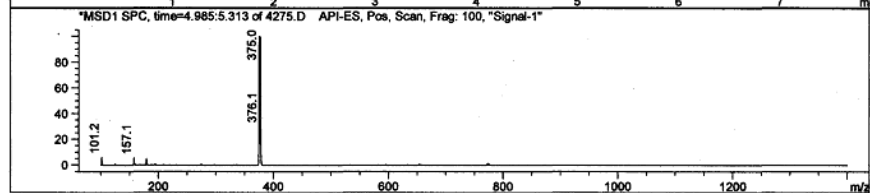

IR spectra of 4-(4,5-diphenyl-1H-imidazol-2-yl)-N,N-dimethylaniline

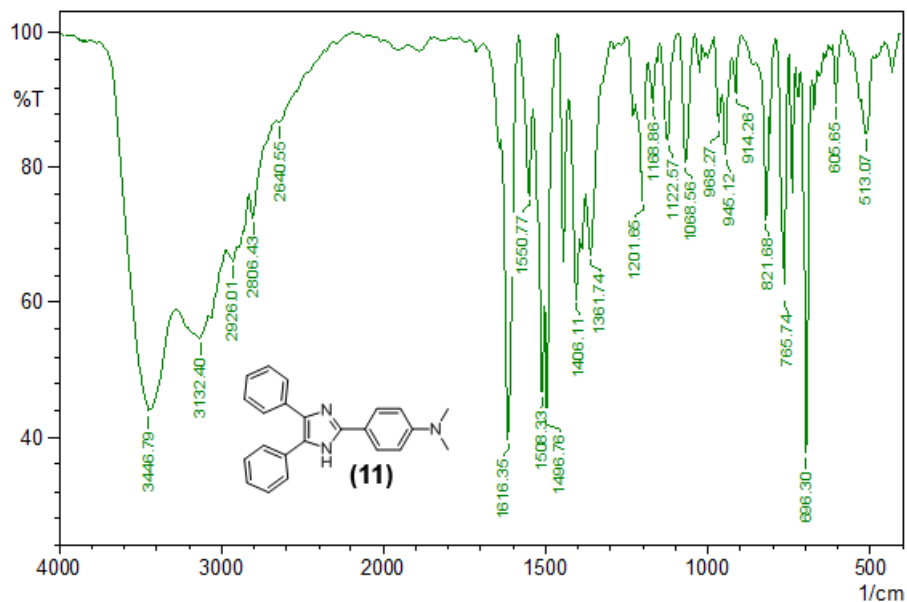

**<sup>1</sup>H NMR of 4-(4,5-diphenyl-1H-imidazol-2-yl)-N,N-dimethylaniline**

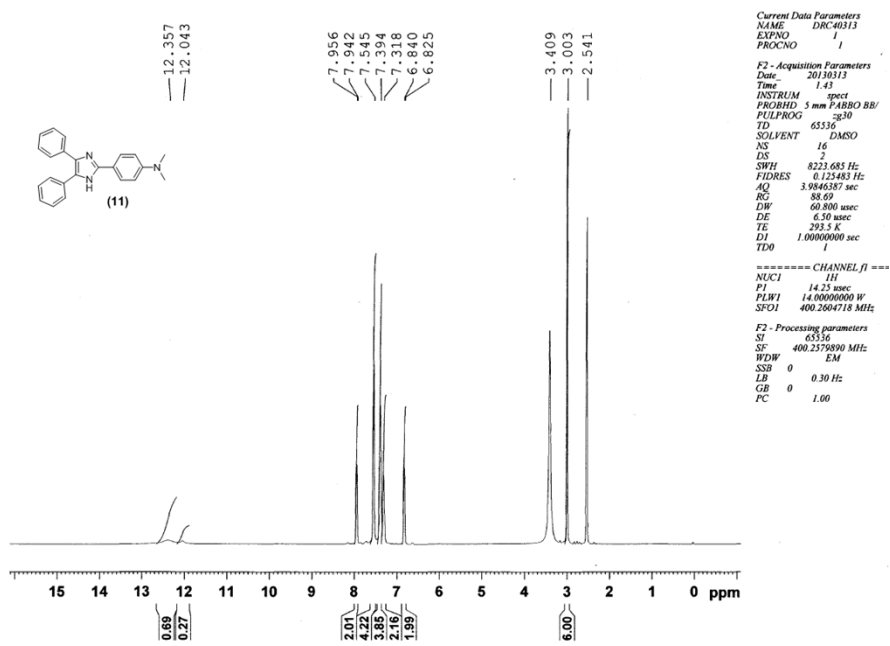

**<sup>13</sup>C NMR of 4-(4,5-diphenyl-1H-imidazol-2-yl)-N,N-dimethylaniline**

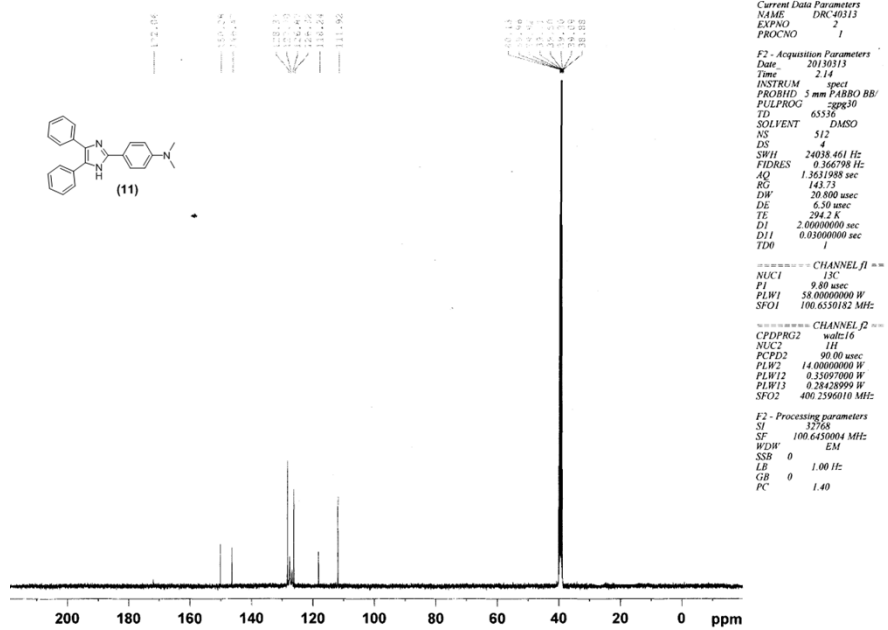

### LC-MS of 4-(4,5-diphenyl-1H-imidazol-2-yl)-N,N-dimethylaniline

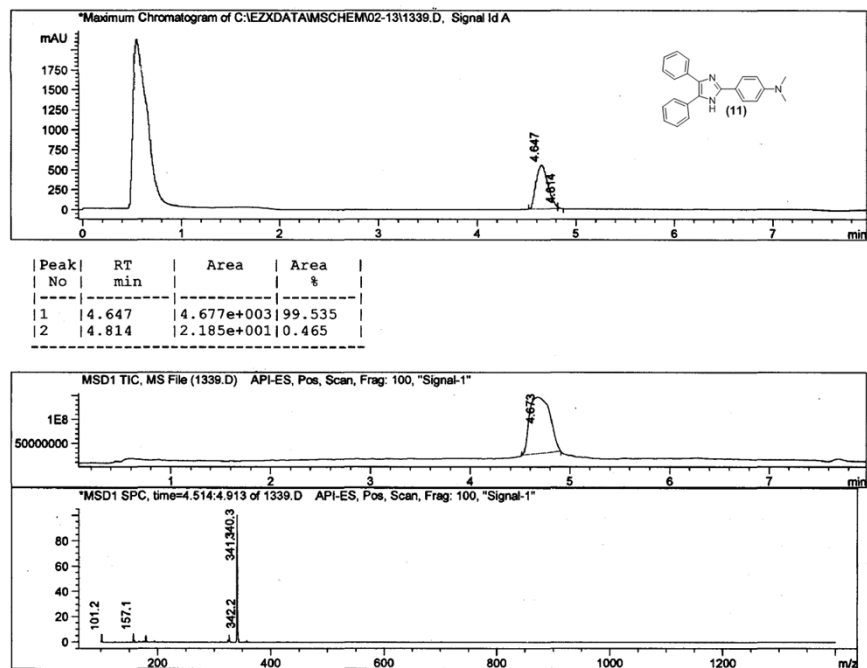

### IR spectra of 2-(biphenyl-4-yl)-4,5-diphenyl-1H-imidazole

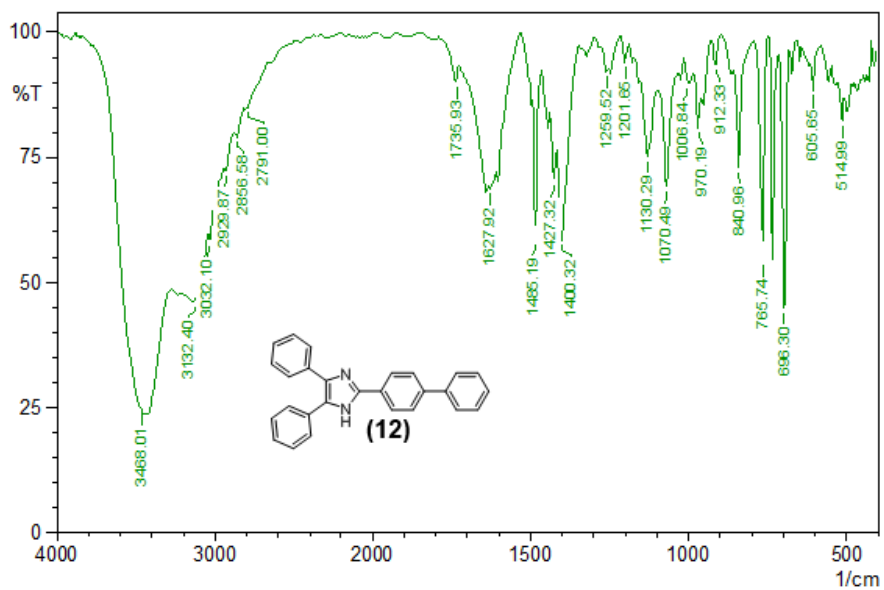

### <sup>1</sup>H NMR of 2-(biphenyl-4-yl)-4,5-diphenyl-1H-imidazole

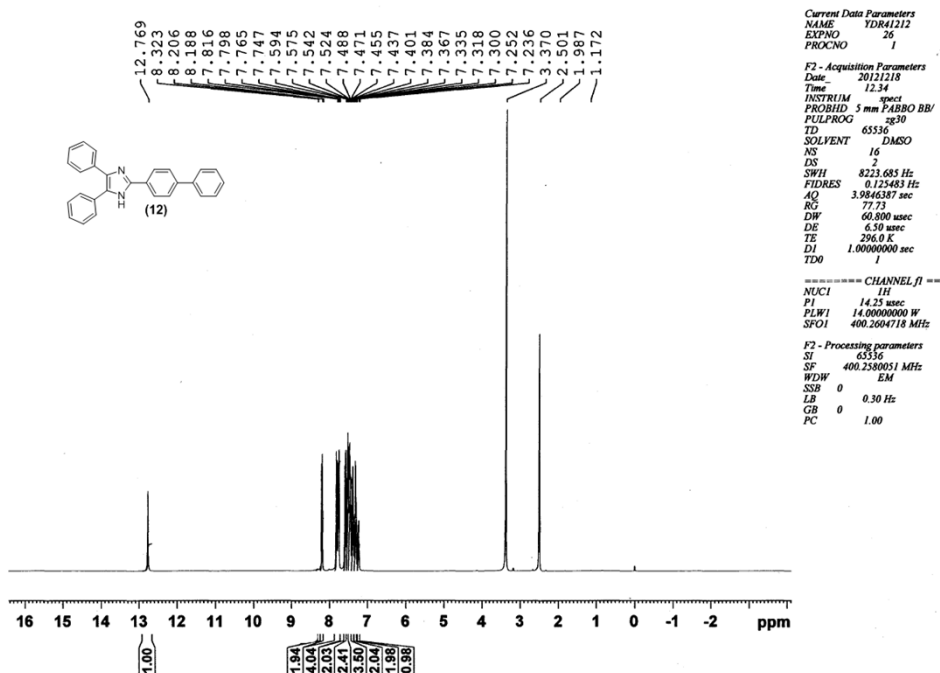

### <sup>13</sup>C NMR of 2-(biphenyl-4-yl)-4,5-diphenyl-1H-imidazole



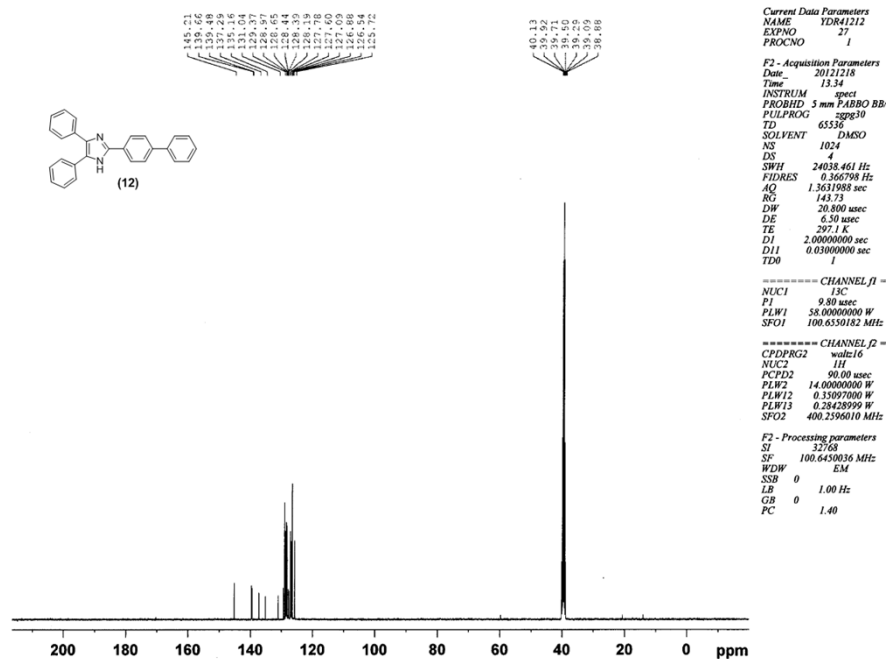

### LC-MS of 2-(biphenyl-4-yl)-4,5-diphenyl-1H-imidazole

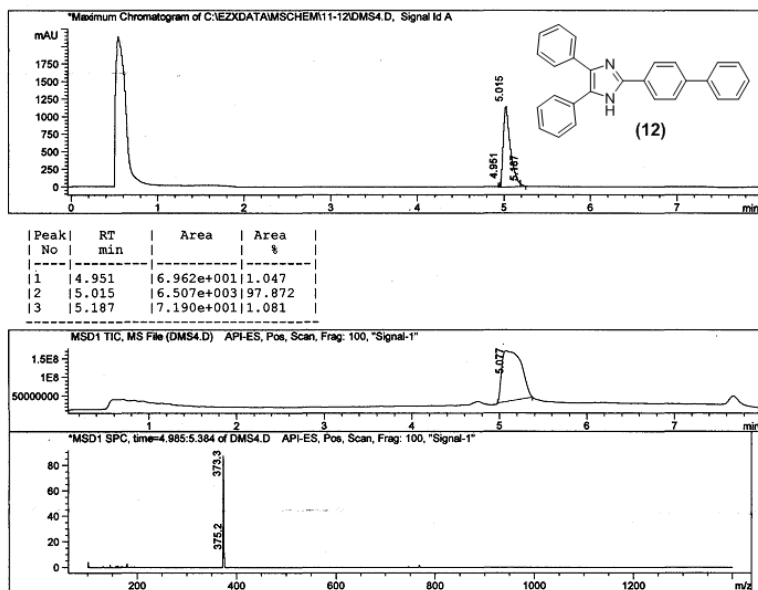

### IR spectra of 1,4-bis(4,5-diphenyl-1H-imidazol-2-yl)benzene

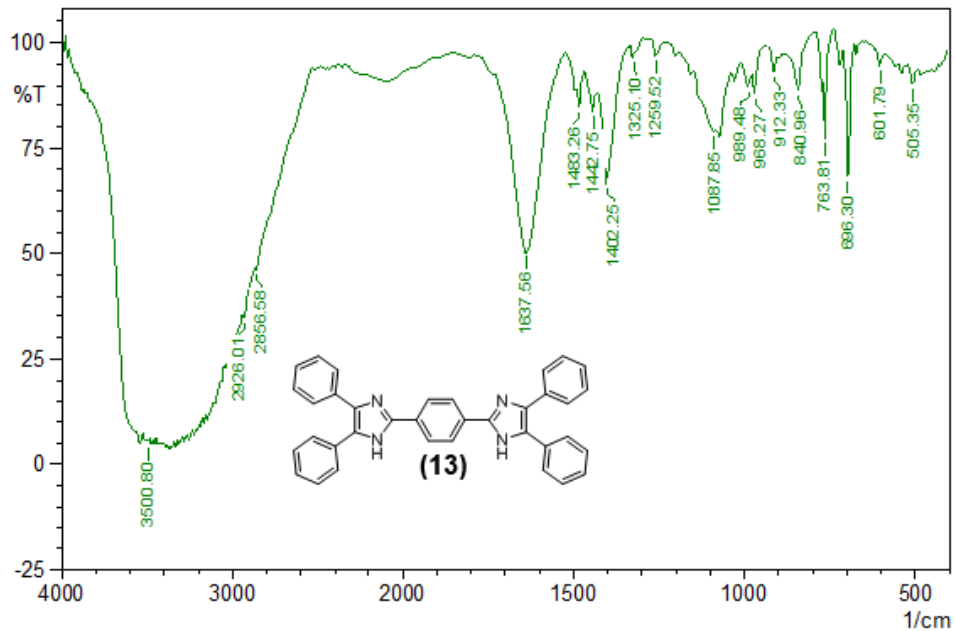

### <sup>1</sup>H NMR of 1,4-bis(4,5-diphenyl-1H-imidazol-2-yl)benzene

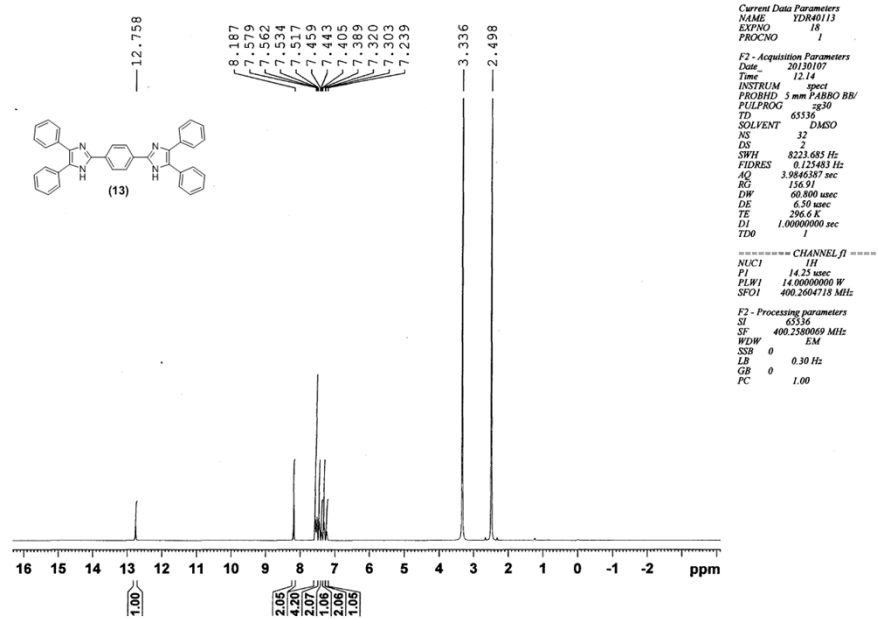

### <sup>13</sup>C NMR of 1,4-bis(4,5-diphenyl-1H-imidazol-2-yl)benzene

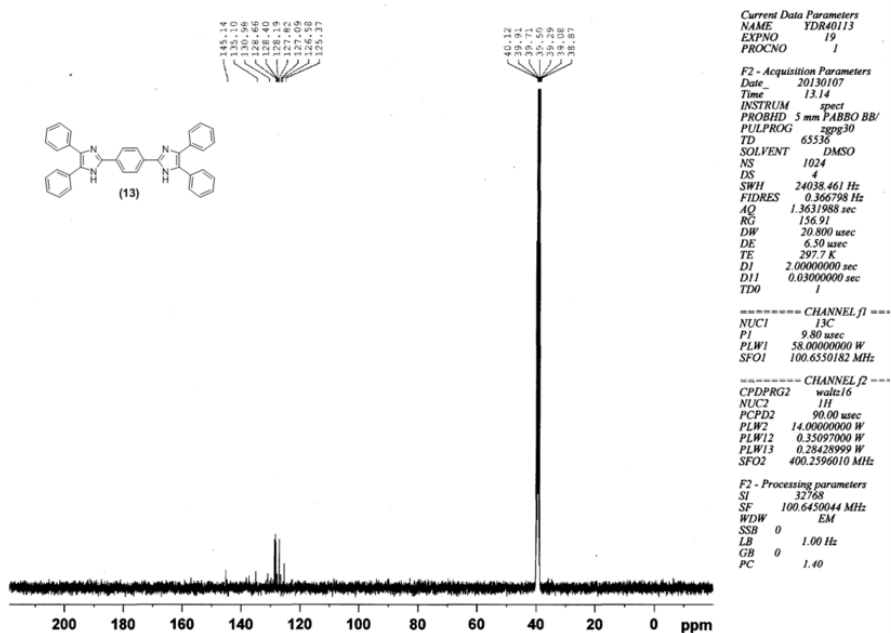

### LC-MS of 1,4-bis(4,5-diphenyl-1H-imidazol-2-yl)benzene

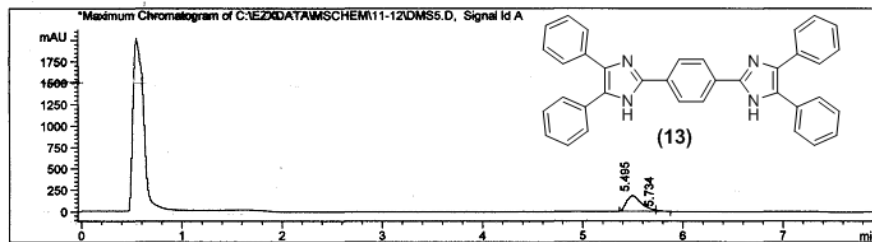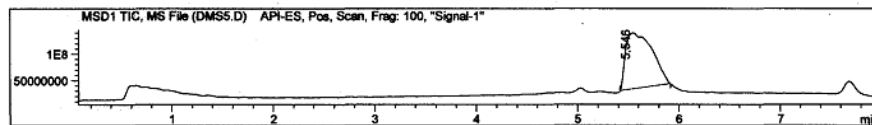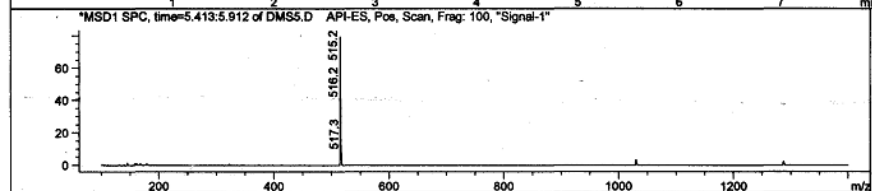

Supplement: c4ra08601e1.pdf [file c4ra08601e1.pdf]
